# Supplementary material
Source: MDPI journal article supplement (https://www.mdpi.com/2304-6740/11/11/434)
Supplement: s1 [file s1]

## Supplementary materials

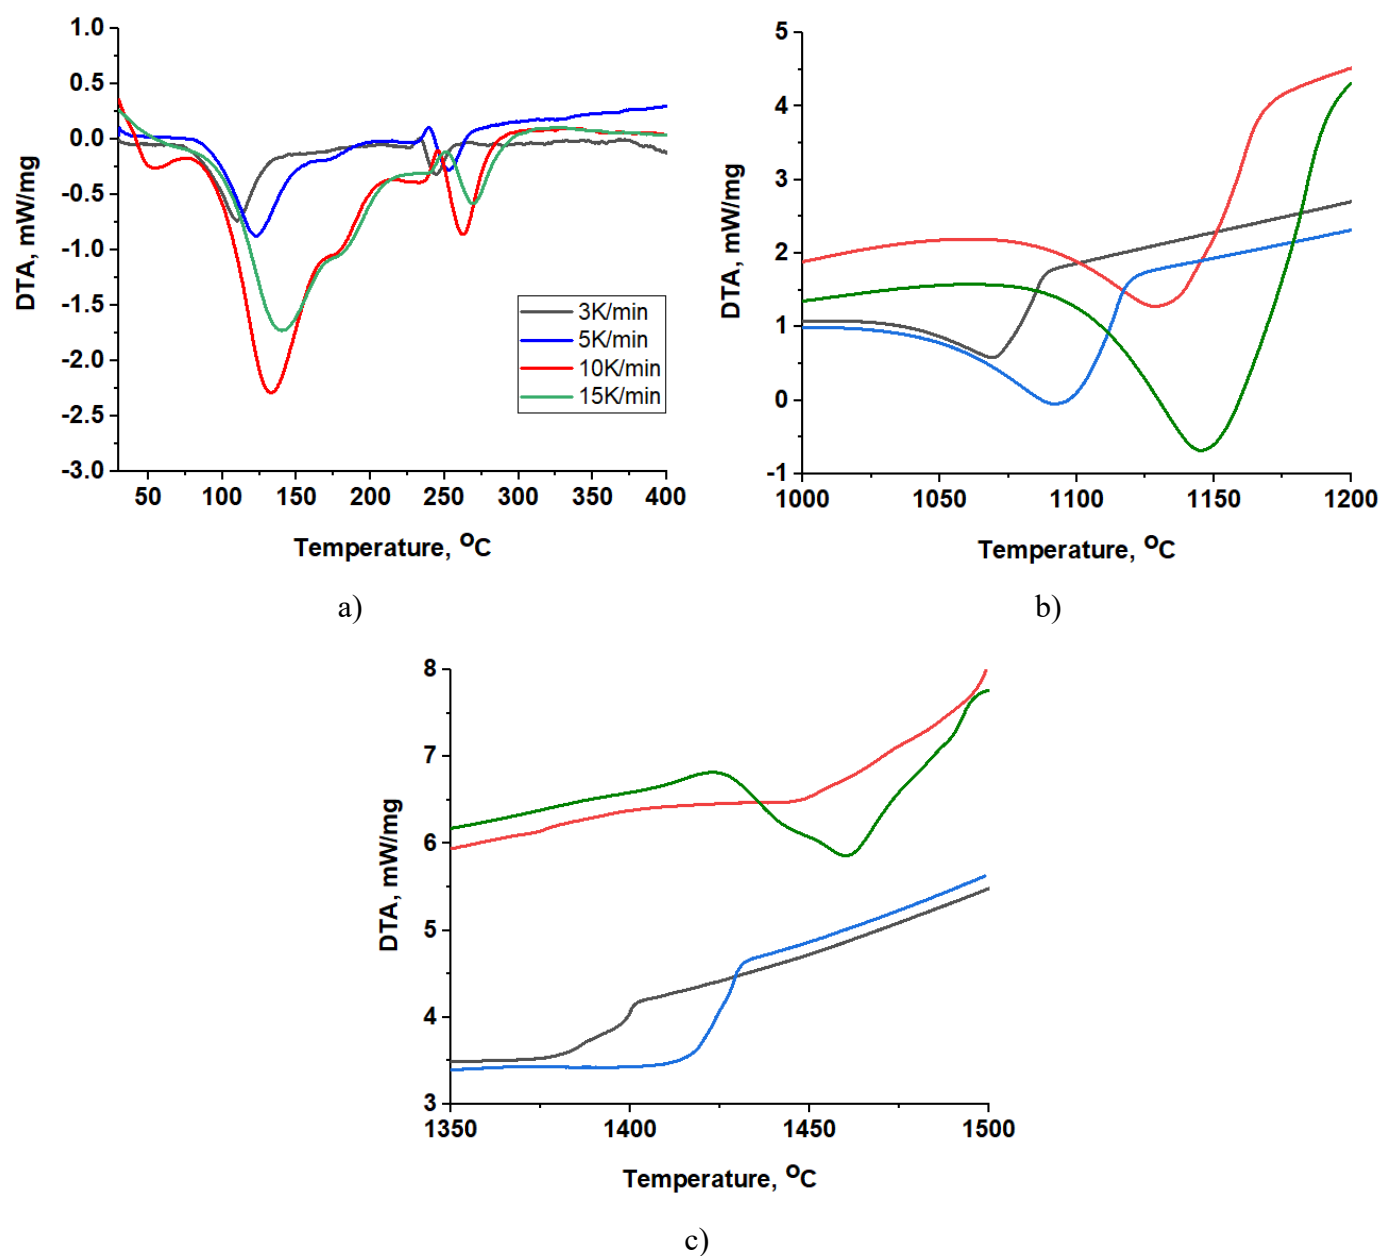

**Figure S1.** Heat effect showing up in dependence of heating rate for processes of destruction of lanthanum sulfates: a – signals A–D, b – signal E, c – signal F

**Table S1.** Fractional atomic coordinates and isotropic displacement parameters ( $\text{\AA}^2$ ) of  $\beta\text{-La}_2(\text{SO}_4)_3$ 

|    | $x$         | $y$         | $z$         | $B_{\text{iso}}$ |
|----|-------------|-------------|-------------|------------------|
| La | 0.14997 (9) | 0.0946 (3)  | 0.0342 (2)  | 0.3 (1)          |
| S1 | 0.3034 (4)  | 0.1002 (16) | 0.3066 (9)  | 2.2 (2)          |
| S2 | 0           | -0.080 (2)  | 0.25        | 2.2 (2)          |
| O1 | 0.0744 (8)  | 0.0205 (17) | 0.2442 (15) | 1.5 (2)          |
| O2 | -0.0248 (8) | -0.178 (2)  | 0.0808 (17) | 1.5 (2)          |
| O4 | 0.3448 (7)  | -0.069 (3)  | 0.3315 (15) | 1.5 (2)          |
| O3 | 0.2171 (9)  | 0.054 (2)   | 0.3111 (14) | 1.5 (2)          |
| O6 | 0.3399 (9)  | 0.261 (2)   | 0.419 (2)   | 1.5 (2)          |
| O5 | 0.2927 (7)  | 0.162 (2)   | 0.1137 (17) | 1.5 (2)          |

**Table S2.** Main bond lengths ( $\text{\AA}$ ) of  $\beta\text{-La}_2(\text{SO}_4)_3$ 

|                      |            |       |            |
|----------------------|------------|-------|------------|
| La—O1                | 2.451 (12) | S1—O4 | 1.38 (2)   |
| La—O1 <sup>i</sup>   | 2.681 (12) | S1—O3 | 1.566 (14) |
| La—O2 <sup>ii</sup>  | 2.324 (12) | S1—O6 | 1.524 (19) |
| La—O4 <sup>iii</sup> | 2.579 (19) | S1—O5 | 1.654 (16) |
| La—O3                | 2.431 (12) | S2—O1 | 1.495 (14) |
| La—O3 <sup>i</sup>   | 2.602 (13) | S2—O2 | 1.567 (16) |
| La—O6 <sup>iv</sup>  | 2.339 (17) | —     | —          |
| La—O5                | 2.537 (10) | —     | —          |
| La—O5 <sup>v</sup>   | 2.418 (13) | —     | —          |

Symmetry codes: (i)  $x, -y, z-1/2$ ; (ii)  $-x, -y, -z$ ; (iii)  $-x+1/2, y+1/2, -z+1/2$ ; (iv)  $-x+1/2, y-1/2, -z+1/2$ ; (v)  $-x+1/2, -y+1/2,$

$-z$

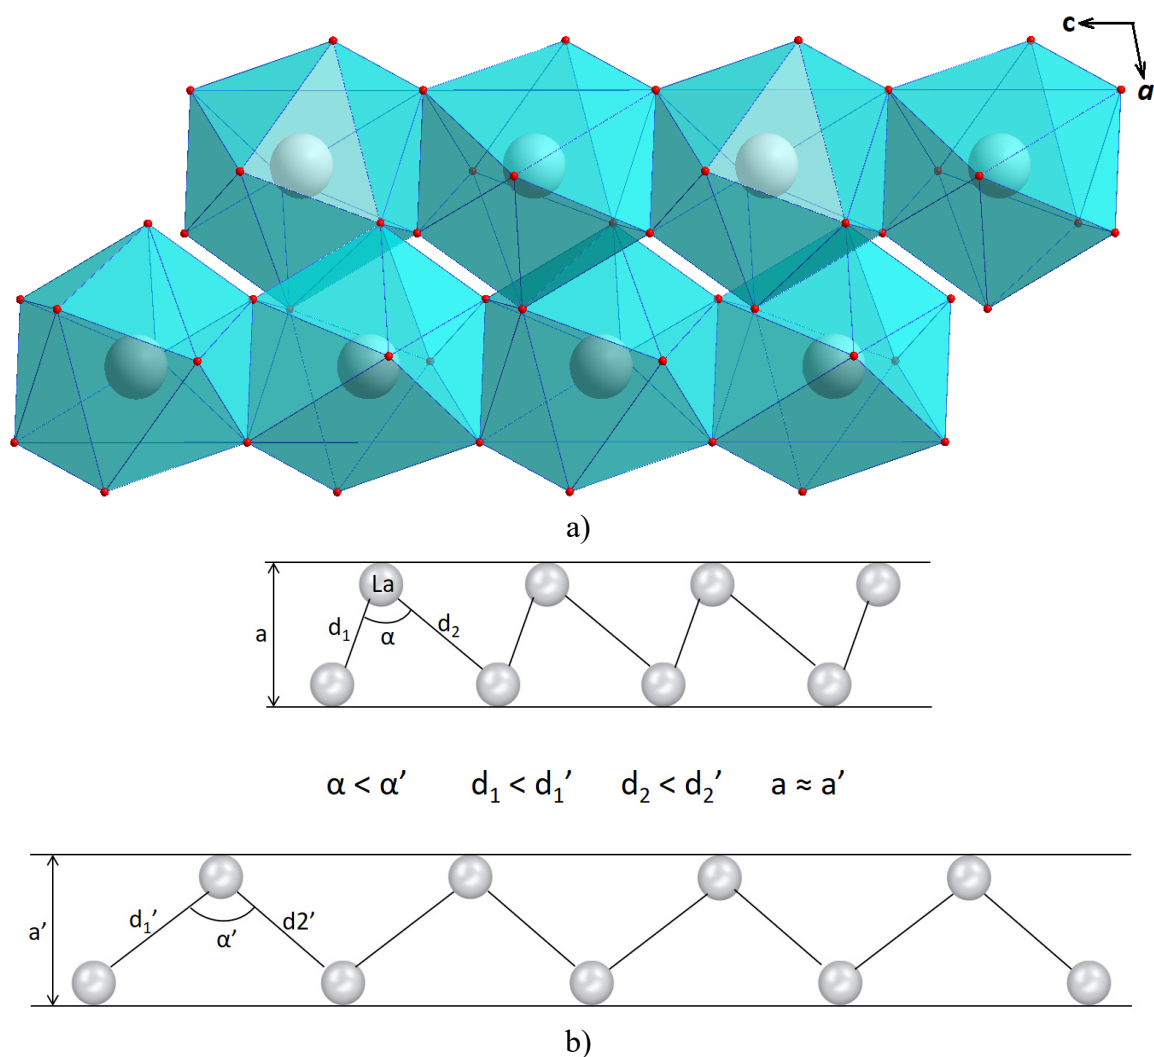

**Figure S2.** Chain structure of  $\text{LaO}_9$  polyhedra (a) and proposed mechanism of zero thermal expansion in the  $\beta\text{-La}_2(\text{SO}_4)_3$  structure (b)

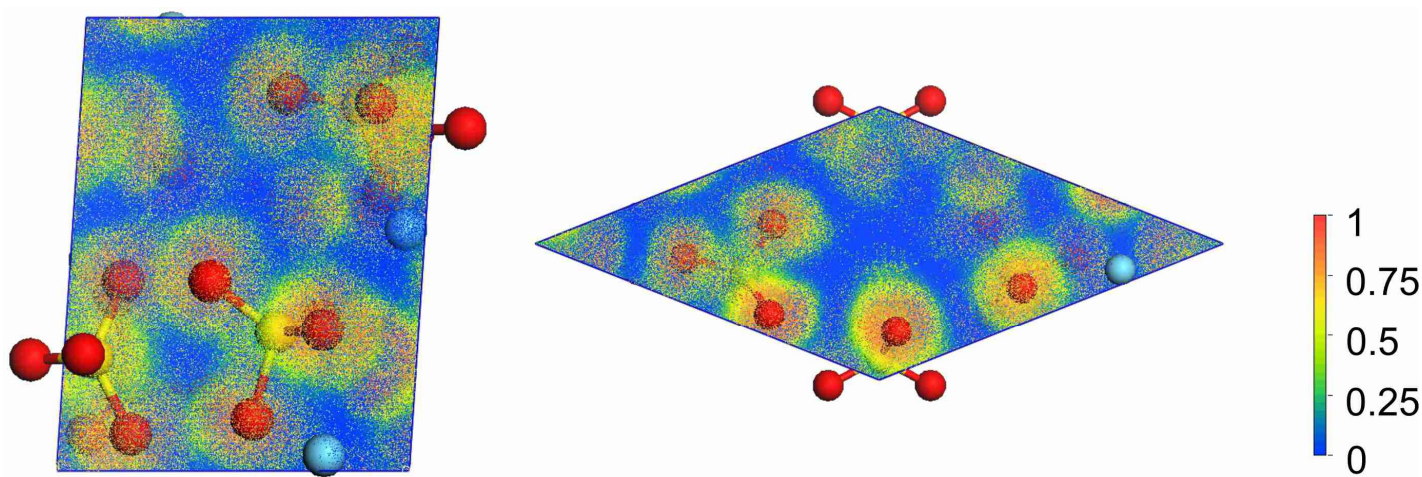

**Figure S3.** Electron localization function in  $\beta\text{-La}_2(\text{SO}_4)_3$  calculated using local density approximation.

**Table S3.** Main parameters of processing and refinement of the  $\text{La}_2(\text{SO}_4)_3 \cdot 9\text{H}_2\text{O}$  sample

| Sp. Gr.                | $P6_3/m$      |
|------------------------|---------------|
| $a$ (Å)                | 11.029515(60) |
| $c$ (Å)                | 8.104587(77)  |
| $V$ (Å <sup>3</sup> )  | 853.836(12)   |
| $Z$                    | 2             |
| $2\theta$ -interval, ° | 10-90         |
| $R_{\text{wp}}$ , %    | 6.52          |
| $R_{\text{p}}$ , %     | 4.43          |
| $\chi^2$               | 2.07          |
| $R_{\text{B}}$ , %     | 5.1           |

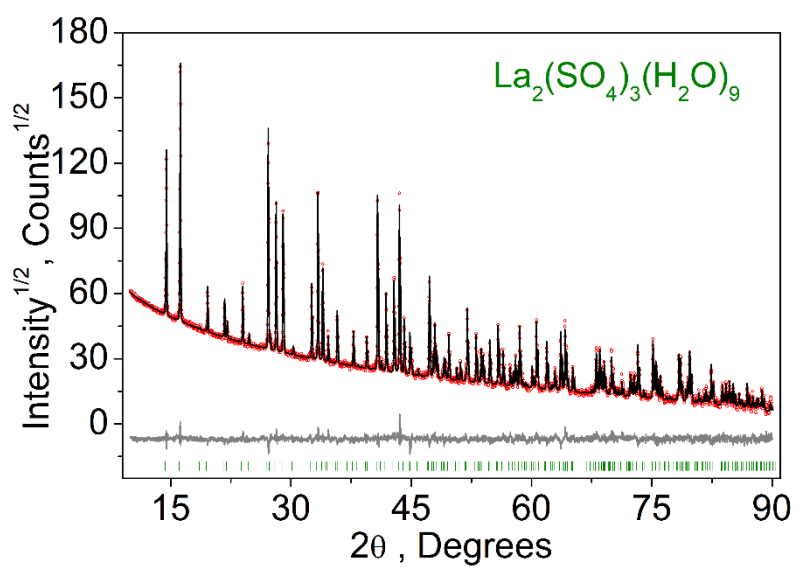**Figure S4.** Difference Rietveld plot of the  $\text{La}_2(\text{SO}_4)_3 \cdot 9\text{H}_2\text{O}$  compound
